# Supplementary material for: Co-hydrolysis of hydrothermal and dilute acid pretreated populus slurries to support development of a high-throughput pretreatment system
Source: Springer Nature journal article supplement (doi:10.1186/1754-6834-4-19), 2011-07-12

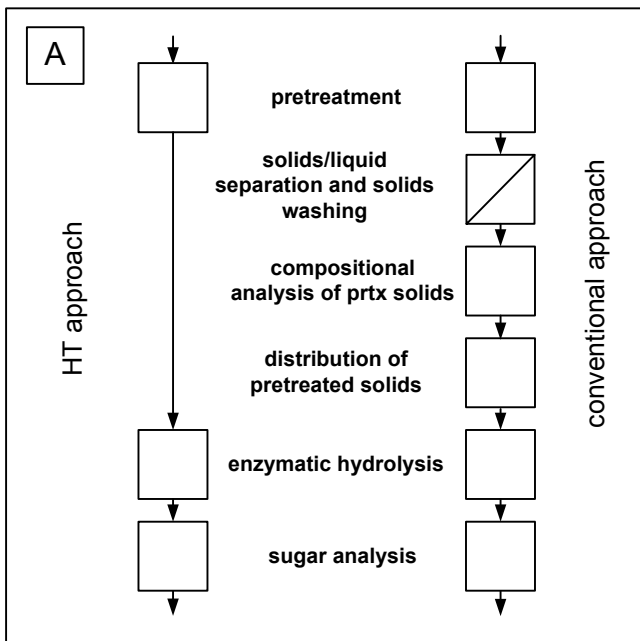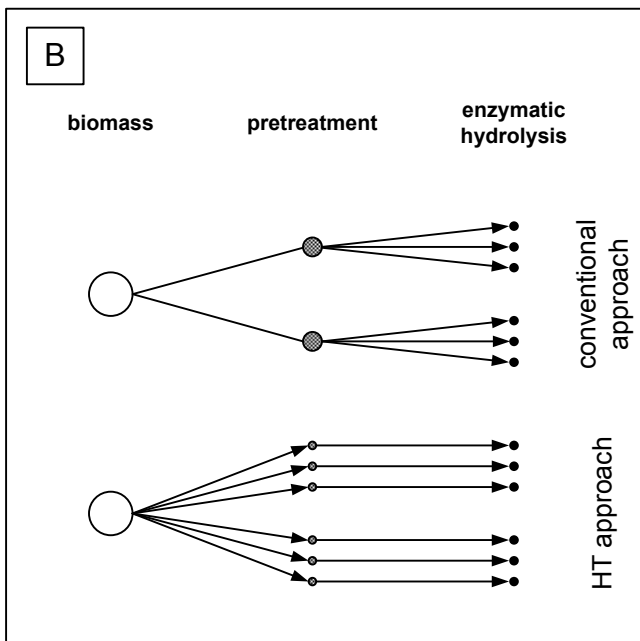

Supplement: 13068_2011_99_MOESM1_ESM.pdf [file 13068_2011_99_MOESM1_ESM.pdf]
